# Supplementary material for: Exhaled breath compositions under varying respiratory rhythms reflects ventilatory variations: translating breathomics towards respiratory medicine
Source: Springer Nature journal article supplement (doi:10.1038/s41598-020-70993-0), 2020-08-24
Supplement: 41598_2020_70993_MOESM1_ESM.pdf [file 41598_2020_70993_MOESM1_ESM.pdf]

## Exhaled breath compositions under varying respiratory rhythms reflects ventilatory variations: translating breathomics towards respiratory medicine

Pritam Sukul<sup>1\*</sup>, Jochen K Schubert<sup>1</sup>, Karim Zanaty<sup>1</sup>, Phillip Trefz<sup>1</sup>, Anupam Sinha<sup>2</sup>, Svend Kamysek<sup>1</sup>, Wolfram Miekisch<sup>1</sup>

<sup>1</sup>Rostock Medical Breath Research Analytics and Technologies (ROMBAT), Dept. of Anaesthesiology and Intensive Care, University Medicine Rostock, Schillingallee 35, 18057 Rostock, Germany

<sup>2</sup>Institute for Clinical Chemistry and Laboratory Medicine, University Clinic Carl Gustav Carus, Fetscherstr. 74, 01307 Dresden, Germany

\* Corresponding author: [pritam.sukul@uni-rostock.de](mailto:pritam.sukul@uni-rostock.de)

**Supplementary Table S1: Summary output for equation (1) and (2).** Corresponding principal statistical parameters and values e.g. R Square, statistical significance, *p*-values etc. are presented with each equation.

$$V'E_{iivs.} = 0.0354 + (0.887 * V'E) - (0.789 * Isoprene) + (1.801 * Isoprene_{iivs.}) \quad (1)$$

| Regression Statistics |       |
|-----------------------|-------|
| Multiple R            | 0.956 |
| R Square              | 0.915 |
| Adjusted R Square     | 0.912 |
| Standard Error        | 0.065 |
| Observations          | 108   |

  

| ANOVA      |     |       |       |         |                |
|------------|-----|-------|-------|---------|----------------|
|            | df  | SS    | MS    | F       | Significance F |
| Regression | 3   | 4.755 | 1.585 | 374.427 | 1.429E-55      |
| Residual   | 104 | 0.440 | 0.004 |         |                |
| Total      | 107 | 5.195 |       |         |                |

  

|                           | Coefficients | Standard Error | t Stat | P-value   | Lower 95% | Upper 95% |
|---------------------------|--------------|----------------|--------|-----------|-----------|-----------|
| Intercept                 | 0.035        | 0.099          | 0.354  | 0.723     | -0.162    | 0.233     |
| V'E                       | 0.887        | 0.053          | 16.550 | 6.630E-31 | 0.781     | 0.993     |
| Isoprene <sub>iivs.</sub> | 1.801        | 0.223          | 8.068  | 1.304E-12 | 1.358     | 2.243     |
| Isoprene                  | -0.789       | 0.093          | -8.404 | 2.390E-13 | -0.975    | -0.603    |

$$pET-CO_2_{iivs.} = 0.512 + (0.0750 * VE) - (0.469 * pET-CO_2) - (0.0788 * Isoprene) + (0.150 * Isoprene_{iivs.}) \quad (2)$$

| Regression Statistics |       |
|-----------------------|-------|
| Multiple R            | 0.920 |
| R Square              | 0.847 |
| Adjusted R Square     | 0.841 |
| Standard Error        | 0.013 |
| Observations          | 108   |

| ANOVA      |     |       |        |         |                |
|------------|-----|-------|--------|---------|----------------|
|            | df  | SS    | MS     | F       | Significance F |
| Regression | 4   | 0.105 | 0.026  | 142.771 | 4.284E-41      |
| Residual   | 103 | 0.019 | 0.0001 |         |                |
| Total      | 107 | 0.124 |        |         |                |

|                     | Coefficients | Standard Error | t Stat | P-value   | Lower 95% | Upper 95% |
|---------------------|--------------|----------------|--------|-----------|-----------|-----------|
| Intercept           | 0.511        | 0.048          | 10.641 | 2.774E-18 | 0.416     | 0.607     |
| pET-CO <sub>2</sub> | -0.469       | 0.060          | -7.795 | 5.396E-12 | -0.588    | -0.349    |
| VE                  | 0.075        | 0.011          | 6.616  | 1.683E-09 | 0.052     | 0.097     |
| Isoprene            | 0.149        | 0.047          | 3.151  | 0.002     | 0.055     | 0.243     |
| Isoprene iivs.      | -0.078       | 0.028          | -2.806 | 0.005     | -0.134    | -0.023    |

**N.B:** Although the coefficient of the intercept in equation (1) was statistically insignificant ( $p$ -value = 0.723), we could not exclude it from our model. In principle, an insignificant intercept denotes to the fact that if other predictor variables are zero (0), the constant is not significantly different from zero. As we performed these experiments on consciously living and healthy humans, we can't assume any of our predictor variables to be zero. Thus, we preferred not to force the residuals to have a zero mean.



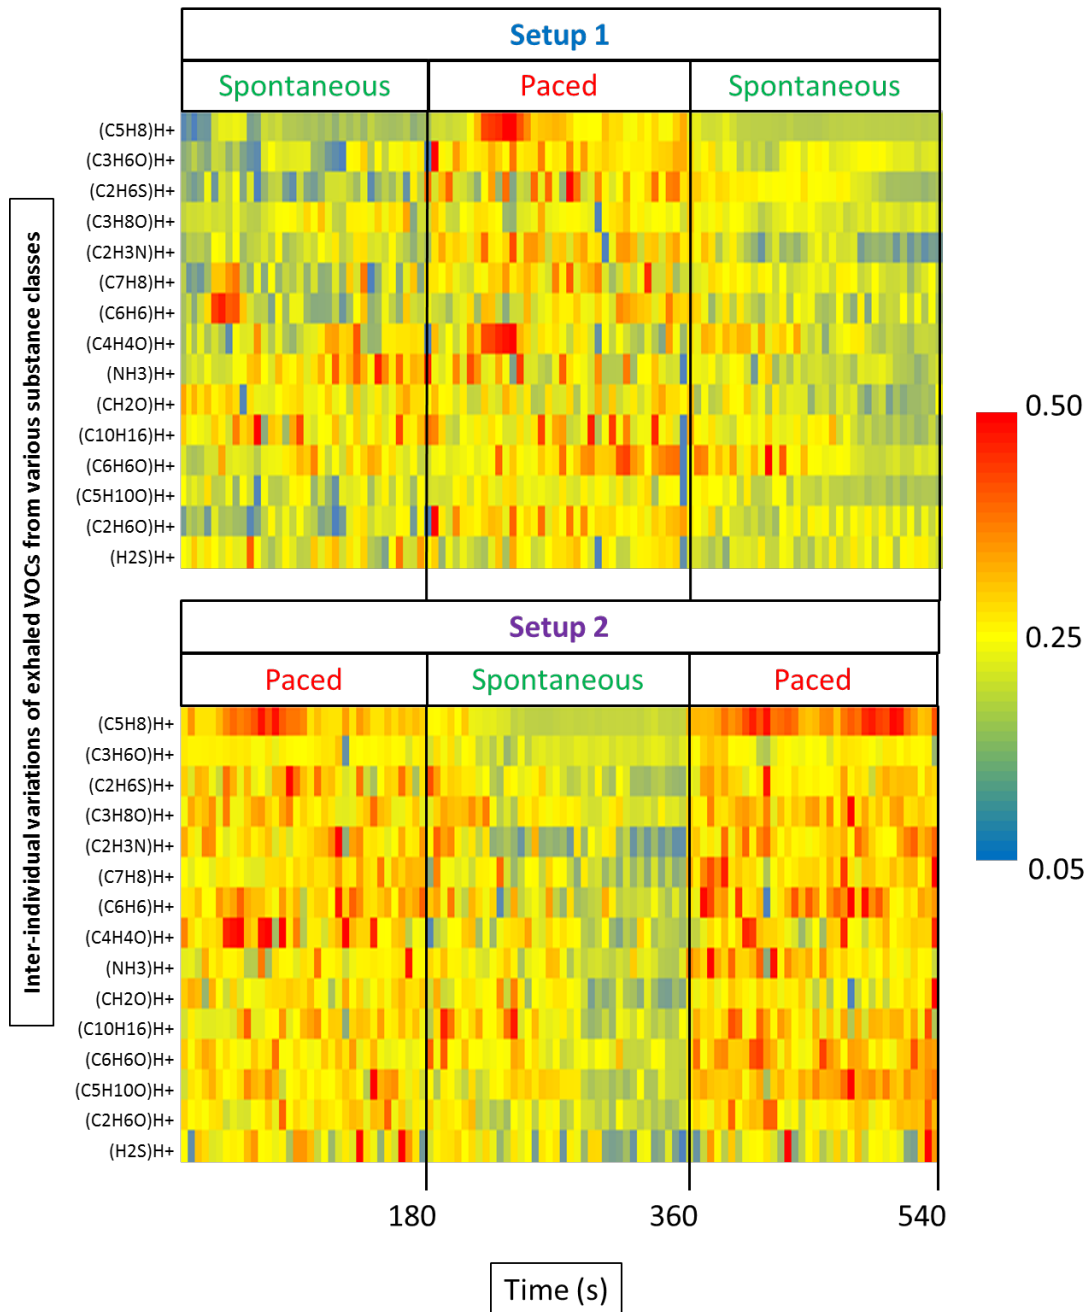

**Supplementary Figure S2: Breath-resolved ventilatory variations in exhaled VOC concentrations from Setup-1 and setup-2.** Changes in colours from red to blue symbolise relative changes from higher to lower values and vice versa. Please refer to the colour scale. A precedent paced breathing has substantially reduced inter-individual variations in exhaled alveolar VOC concentrations during the final minutes of subsequent spontaneous rhythms in both setups. These values are inter-individual variations (breath-resolved) of the normalised mean (from all participants) of each variable. These VOCs belong to various substance classes and origin. Substances with similar physico-chemical properties behaved alike. Statistical validation and inter-setup reproducibility of ventilatory variations are presented in Supplementary Figure S3 online.

| Study setup | Respiratory rhythms | Minute    | Changes (%) in median range of variations in 67 masses/60 s | Significance ( $P \leq 0.005$ )/ Median/60 s |
|-------------|---------------------|-----------|-------------------------------------------------------------|----------------------------------------------|
| Setup-1     | Spontaneous         | M1        | ~ 6 - 21 (+)                                                | <0.001                                       |
|             |                     | M2        | ~ 4.3 - 11 ( $\pm$ )                                        | <0.005                                       |
|             |                     | M3        | ~ 6 - 15 ( $\pm$ )                                          | <0.001                                       |
|             | Paced               | M4        | ~ 4 - 18 (+)                                                | <0.001                                       |
|             |                     | M5        | ~ 11 - 23 (+)                                               | <0.001                                       |
|             |                     | M6        | ~ 9 - 31 (+)                                                | <0.001                                       |
|             | Spontaneous         | M7        | ~ 4 - 11 (+)                                                | <0.005                                       |
|             |                     | M8        | ~ 2.4 - 7.3 ( $\pm$ )                                       | 0.005                                        |
|             |                     | <b>M9</b> | <b>0</b>                                                    | <b>N/A</b>                                   |
| Setup-2     | Paced               | M1        | ~ 5 - 25 (+)                                                | <0.001                                       |
|             |                     | M2        | ~ 11 - 37 (+)                                               | <0.001                                       |
|             |                     | M3        | ~ 17 - 45 (+)                                               | <0.001                                       |
|             | Spontaneous         | M4        | ~ 3.4 - 11 (+)                                              | <0.005                                       |
|             |                     | M5        | ~ 3 - 7 ( $\pm$ )                                           | 0.005                                        |
|             |                     | <b>M6</b> | <b>0.5 - 2.4 (<math>\pm</math>)</b>                         | <b>&gt;0.005</b>                             |
|             | Paced               | M7        | ~ 5 - 35 (+)                                                | <0.001                                       |
|             |                     | M8        | ~ 9 - 46 (+)                                                | <0.001                                       |
|             |                     | M9        | ~ 13 - 59 (+)                                               | <0.001                                       |

**Supplementary Table S2: Reproducibility and statistical validation of breath-resolved ventilatory variations in exhaled VOC concentrations in Setup-1 and setup-2.** Differences in ventilatory variations in volatile masses were statistically compared for 67 measured volatile masses with relatively higher abundances in exhalation than in the room-air (chosen from **Supplementary Figure S1 online**). Intra-individual variations from respiratory rhythms (over each 60 s) were compared within- and between two setups. Changes (%) in median range ( $\pm$ ) of variations in all volatiles are presented with respect to the values at the 9<sup>th</sup> minute of spontaneous rhythm from setup-1 (M9). Statistical significance of differences was tested by means of one-way repeated measurement-ANOVA on ranks ( $p$ -value  $\leq 0.005$ ). We used the 9<sup>th</sup> minute (M9 marked in bold) of the Setup-1 as the comparison point. From all pairwise-multiple comparisons, statistically different and indifferent (i.e. with no significant differences and thereby, reproducible) respiratory phases are presented with corresponding  $p$ -value. RM-ANOVA results of all pairwise multiple comparisons are presented in Supplementary Table S3 online.

**Analysis:** In our large data matrix consists of 67 rows and 18 columns. Each row represents the median values (over each minute) of variations from a mass over the entire experiment. Each column represents a particular minute of measurement. In order to statistically compare the minutes upon the variations contributed by 67 measured masses, we applied Friedman Repeated Measures Analysis of Variance on Ranks (RM-ANOVA Pairwise Multiple Comparisons via Student-Newman-Keuls Method,  $p$ -value  $\leq 0.005$ ) in SigmaPlot (version 14) software.

### Friedman Repeated Measures Analysis of Variance on Ranks

| Group | N  | Missing | Median | 25%   | 75%   |
|-------|----|---------|--------|-------|-------|
| S1-M1 | 67 | 0       | 0.300  | 0.200 | 0.400 |
| S1-M2 | 67 | 0       | 0.300  | 0.200 | 0.400 |
| S2-M3 | 67 | 0       | 0.300  | 0.200 | 0.400 |
| S1-M4 | 67 | 0       | 0.300  | 0.200 | 0.500 |
| S1-M5 | 67 | 0       | 0.300  | 0.200 | 0.500 |
| S1-M6 | 67 | 0       | 0.300  | 0.200 | 0.500 |
| S1-M7 | 67 | 0       | 0.300  | 0.200 | 0.500 |
| S1-M8 | 67 | 0       | 0.300  | 0.200 | 0.400 |
| S1-M9 | 67 | 0       | 0.300  | 0.200 | 0.400 |
| S2-M1 | 67 | 0       | 0.300  | 0.200 | 0.500 |
| S2-M2 | 67 | 0       | 0.300  | 0.200 | 0.500 |
| S2-M3 | 67 | 0       | 0.300  | 0.200 | 0.500 |
| S2-M4 | 67 | 0       | 0.300  | 0.200 | 0.500 |
| S2-M5 | 67 | 0       | 0.300  | 0.200 | 0.500 |
| S2-M6 | 67 | 0       | 0.300  | 0.200 | 0.400 |
| S2-M7 | 67 | 0       | 0.300  | 0.200 | 0.500 |
| S2-M8 | 67 | 0       | 0.300  | 0.200 | 0.500 |
| S2-M9 | 67 | 0       | 0.300  | 0.200 | 0.500 |

Chi-square= 269.096 with 17 degrees of freedom. ( $p = <0.001$ )

The differences in the median values among the treatment groups are greater than would be expected by chance; there is a statistically significant difference ( $p = <0.001$ )

To isolate the group or groups that differ from the others use a multiple comparison procedure.

All Pairwise Multiple Comparison Procedures (Student-Newman-Keuls Method):

| Comparison            | Diff of Ranks | q     | p      | Significance ( $p = <0.005$ ) |
|-----------------------|---------------|-------|--------|-------------------------------|
| S2-M7 vs S1-M8        | 360.000       | 8.238 | 0.003  | Yes                           |
| S2-M7 vs <b>S2-M6</b> | 334.500       | 8.093 | 0.002  | Yes                           |
| S2-M7 vs <b>S1-M9</b> | 321.000       | 8.237 | <0.001 | Yes                           |
| S2-M7 vs S1-M2        | 317.000       | 8.660 | <0.001 | Yes                           |
| S2-M7 vs S1-M7        | 259.500       | 7.578 | <0.001 | Yes                           |
| S2-M7 vs S1-M1        | 252.500       | 7.921 | <0.001 | Yes                           |
| S2-M7 vs S2-M3        | 211.500       | 7.166 | <0.001 | Yes                           |
| S2-M7 vs S1-M4        | 187.500       | 6.907 | <0.001 | Yes                           |
| S2-M7 vs S2-M5        | 187.500       | 7.566 | <0.001 | Yes                           |
| S2-M7 vs S2-M4        | 179.000       | 7.985 | <0.001 | Yes                           |
| S2-M7 vs S1-M6        | 143.000       | 7.132 | <0.001 | Yes                           |
| S2-M7 vs S2-M8        | 115.500       | 6.532 | <0.001 | Yes                           |
| S2-M7 vs S1-M5        | 105.500       | 6.889 | <0.001 | Yes                           |
| S2-M7 vs S2-M1        | 97.500        | 7.534 | <0.001 | Yes                           |

|                       |         |       |        |             |
|-----------------------|---------|-------|--------|-------------|
| S2-M7 vs S2-M3        | 52.500  | 4.968 | 0.002  | Yes         |
| S2-M7 vs S2-M9        | 18.500  | 2.260 | 0.246  | No          |
| S2-M7 vs S2-M2        | 16.500  | 2.851 | 0.044  | Do Not Test |
| S2-M2 vs S1-M8        | 343.500 | 8.310 | 0.002  | Yes         |
| S2-M2 vs <b>S2-M6</b> | 318.000 | 8.160 | <0.001 | Yes         |
| S2-M2 vs <b>S1-M9</b> | 304.500 | 8.318 | <0.001 | Yes         |
| S2-M2 vs S1-M2        | 300.500 | 8.776 | <0.001 | Yes         |
| S2-M2 vs S1-M7        | 243.000 | 7.623 | <0.001 | Yes         |
| S2-M2 vs S1-M1        | 236.000 | 7.997 | <0.001 | Yes         |
| S2-M2 vs S2-M3        | 195.000 | 7.183 | <0.001 | Yes         |
| S2-M2 vs S1-M4        | 171.000 | 6.900 | <0.001 | Yes         |
| S2-M2 vs S2-M5        | 171.000 | 7.628 | <0.001 | Yes         |
| S2-M2 vs S2-M4        | 162.500 | 8.105 | <0.001 | Yes         |
| S2-M2 vs S1-M6        | 126.500 | 7.154 | <0.001 | Yes         |
| S2-M2 vs S2-M8        | 99.000  | 6.465 | <0.001 | Yes         |
| S2-M2 vs S1-M5        | 89.000  | 6.877 | <0.001 | Yes         |
| S2-M2 vs S2-M1        | 81.000  | 7.665 | <0.001 | Yes         |
| S2-M2 vs S2-M3        | 36.000  | 4.398 | 0.005  | Yes         |
| S2-M2 vs S2-M9        | 2.000   | 0.346 | 0.807  | Do Not Test |
| S2-M9 vs S1-M8        | 341.500 | 8.763 | <0.001 | Yes         |
| S2-M9 vs <b>S2-M6</b> | 316.000 | 8.632 | <0.001 | Yes         |
| S2-M9 vs <b>S1-M9</b> | 302.500 | 8.834 | <0.001 | Yes         |
| S2-M9 vs S1-M2        | 298.500 | 9.364 | <0.001 | Yes         |
| S2-M9 vs S1-M7        | 241.000 | 8.166 | <0.001 | Yes         |
| S2-M9 vs S1-M1        | 234.000 | 8.620 | <0.001 | Yes         |
| S2-M9 vs S2-M3        | 193.000 | 7.788 | <0.001 | Yes         |
| S2-M9 vs S1-M4        | 169.000 | 7.539 | <0.001 | Yes         |
| S2-M9 vs S2-M5        | 169.000 | 8.429 | <0.001 | Yes         |
| S2-M9 vs S2-M4        | 160.500 | 9.077 | <0.001 | Yes         |
| S2-M9 vs S1-M6        | 124.500 | 8.130 | <0.001 | Yes         |
| S2-M9 vs S2-M8        | 97.000  | 7.495 | <0.001 | Yes         |
| S2-M9 vs S1-M5        | 87.000  | 8.233 | <0.001 | Yes         |
| S2-M9 vs S2-M1        | 79.000  | 9.651 | <0.001 | Yes         |
| S2-M9 vs S2-M3        | 34.000  | 5.874 | <0.001 | Yes         |
| S2-M3 vs S1-M8        | 307.500 | 8.400 | <0.001 | Yes         |
| S2-M3 vs <b>S2-M6</b> | 282.000 | 8.236 | <0.001 | Yes         |
| S2-M3 vs <b>S1-M9</b> | 268.500 | 8.423 | <0.001 | Yes         |
| S2-M3 vs S1-M2        | 264.500 | 8.962 | <0.001 | Yes         |
| S2-M3 vs S1-M7        | 207.000 | 7.625 | <0.001 | Yes         |
| S2-M3 vs S1-M1        | 200.000 | 8.070 | <0.001 | Yes         |
| S2-M3 vs S2-M3        | 159.000 | 7.093 | <0.001 | Yes         |
| S2-M3 vs S1-M4        | 135.000 | 6.733 | <0.001 | Yes         |
| S2-M3 vs S2-M5        | 135.000 | 7.635 | <0.001 | Yes         |
| S2-M3 vs S2-M4        | 126.500 | 8.261 | <0.001 | Yes         |
| S2-M3 vs S1-M6        | 90.500  | 6.993 | <0.001 | Yes         |
| S2-M3 vs S2-M8        | 63.000  | 5.962 | <0.001 | Yes         |
| S2-M3 vs S1-M5        | 53.000  | 6.475 | <0.001 | Yes         |
| S2-M3 vs S2-M1        | 45.000  | 7.775 | <0.001 | Yes         |
| S2-M1 vs S1-M8        | 262.500 | 7.666 | <0.001 | Yes         |
| S2-M1 vs <b>S2-M6</b> | 237.000 | 7.435 | <0.001 | Yes         |
| S2-M1 vs <b>S1-M9</b> | 223.500 | 7.573 | <0.001 | Yes         |
| S2-M1 vs S1-M2        | 219.500 | 8.085 | <0.001 | Yes         |
| S2-M1 vs S1-M7        | 162.000 | 6.537 | <0.001 | Yes         |
| S2-M1 vs S1-M1        | 155.000 | 6.915 | <0.001 | Yes         |
| S2-M1 vs S2-M3        | 114.000 | 5.686 | 0.001  | Yes         |
| S2-M1 vs S1-M4        | 90.000  | 5.090 | 0.005  | Yes         |

|                       |         |       |        |             |
|-----------------------|---------|-------|--------|-------------|
| S2-M1 vs S2-M5        | 90.000  | 5.877 | <0.001 | Yes         |
| S2-M1 vs S2-M4        | 81.500  | 6.297 | <0.001 | Yes         |
| S2-M1 vs S1-M6        | 45.500  | 4.306 | 0.002  | Yes         |
| S2-M1 vs S2-M8        | 18.000  | 2.199 | 0.265  | No          |
| S2-M1 vs S1-M5        | 8.000   | 1.382 | 0.328  | Do Not Test |
| S1-M5 vs S1-M8        | 254.500 | 7.984 | <0.001 | Yes         |
| S1-M5 vs <b>S2-M6</b> | 229.000 | 7.759 | <0.001 | Yes         |
| S1-M5 vs <b>S1-M9</b> | 215.500 | 7.938 | <0.001 | Yes         |
| S1-M5 vs S1-M2        | 211.500 | 8.534 | <0.001 | Yes         |
| S1-M5 vs S1-M7        | 154.000 | 6.870 | <0.001 | Yes         |
| S1-M5 vs S1-M1        | 147.000 | 7.332 | <0.001 | Yes         |
| S1-M5 vs S2-M3        | 106.000 | 5.995 | <0.001 | Yes         |
| S1-M5 vs S1-M4        | 82.000  | 5.355 | 0.002  | Yes         |
| S1-M5 vs S2-M5        | 82.000  | 6.336 | <0.001 | Yes         |
| S1-M5 vs S2-M4        | 73.500  | 6.955 | <0.001 | Yes         |
| S1-M5 vs S1-M6        | 37.500  | 4.581 | 0.003  | Yes         |
| S1-M5 vs S2-M8        | 10.000  | 1.728 | 0.222  | Do Not Test |
| S2-M8 vs S1-M8        | 244.500 | 8.285 | <0.001 | Yes         |
| S2-M8 vs <b>S2-M6</b> | 219.000 | 8.067 | <0.001 | Yes         |
| S2-M8 vs <b>S1-M9</b> | 205.500 | 8.292 | <0.001 | Yes         |
| S2-M8 vs S1-M2        | 201.500 | 8.989 | <0.001 | Yes         |
| S2-M8 vs S1-M7        | 144.000 | 7.182 | <0.001 | Yes         |
| S2-M8 vs S1-M1        | 137.000 | 7.748 | <0.001 | Yes         |
| S2-M8 vs S2-M3        | 96.000  | 6.269 | <0.001 | Yes         |
| S2-M8 vs S1-M4        | 72.000  | 5.563 | <0.001 | Yes         |
| S2-M8 vs S2-M5        | 72.000  | 6.814 | <0.001 | Yes         |
| S2-M8 vs S2-M4        | 63.500  | 7.758 | <0.001 | Yes         |
| S2-M8 vs S1-M6        | 27.500  | 4.751 | <0.001 | Yes         |
| S1-M6 vs S1-M8        | 217.000 | 7.993 | <0.001 | Yes         |
| S1-M6 vs <b>S2-M6</b> | 191.500 | 7.727 | <0.001 | Yes         |
| S1-M6 vs <b>S1-M9</b> | 178.000 | 7.941 | <0.001 | Yes         |
| S1-M6 vs S1-M2        | 174.000 | 8.678 | <0.001 | Yes         |
| S1-M6 vs S1-M7        | 116.500 | 6.588 | <0.001 | Yes         |
| S1-M6 vs S1-M1        | 109.500 | 7.151 | <0.001 | Yes         |
| S1-M6 vs S2-M3        | 68.500  | 5.293 | 0.002  | Yes         |
| S1-M6 vs S1-M4        | 44.500  | 4.211 | 0.005  | Yes         |
| S1-M6 vs S2-M5        | 44.500  | 5.437 | <0.001 | Yes         |
| S1-M6 vs S2-M4        | 36.000  | 6.220 | <0.001 | Yes         |
| S2-M4 vs S1-M8        | 181.000 | 7.304 | <0.001 | Yes         |
| S2-M4 vs <b>S2-M6</b> | 155.500 | 6.937 | <0.001 | Yes         |
| S2-M4 vs <b>S1-M9</b> | 142.000 | 7.082 | 0.002  | Yes         |
| S2-M4 vs S1-M2        | 138.000 | 7.804 | <0.001 | Yes         |
| S2-M4 vs S1-M7        | 80.500  | 5.257 | 0.003  | Yes         |
| S2-M4 vs S1-M1        | 73.500  | 5.679 | <0.001 | Yes         |
| S2-M4 vs S2-M3        | 32.500  | 3.076 | 0.130  | No          |
| S2-M4 vs S1-M4        | 8.500   | 1.038 | 0.743  | Do Not Test |
| S2-M4 vs S2-M5        | 8.500   | 1.469 | 0.299  | Do Not Test |
| S2-M5 vs S1-M8        | 172.500 | 7.695 | <0.001 | Yes         |
| S2-M5 vs <b>S2-M6</b> | 147.000 | 7.332 | <0.001 | Yes         |
| S2-M5 vs <b>S1-M9</b> | 133.500 | 7.550 | 0.005  | Yes         |
| S2-M5 vs S1-M2        | 129.500 | 8.457 | <0.001 | Yes         |
| S2-M5 vs S1-M7        | 72.000  | 5.563 | <0.001 | Yes         |
| S2-M5 vs S1-M1        | 65.000  | 6.151 | <0.001 | Yes         |
| S2-M5 vs S2-M3        | 24.000  | 2.932 | 0.095  | Do Not Test |
| S2-M5 vs S1-M4        | 0.000   | 0.000 | 1.000  | Do Not Test |
| S1-M4 vs S1-M8        | 172.500 | 8.604 | <0.001 | Yes         |



|                              |               |              |              |                    |
|------------------------------|---------------|--------------|--------------|--------------------|
| S1-M4 vs <b>S2-M6</b>        | 147.000       | 8.313        | <0.001       | Yes                |
| S1-M4 vs <b>S1-M9</b>        | 133.500       | 8.718        | <0.001       | Yes                |
| S1-M4 vs S1-M2               | 129.500       | 10.006       | <0.001       | Yes                |
| S1-M4 vs S1-M7               | 72.000        | 6.814        | <0.001       | Yes                |
| S1-M4 vs S1-M1               | 65.000        | 7.941        | <0.001       | Yes                |
| S1-M4 vs S2-M3               | 24.000        | 4.147        | 0.006        | Do Not Test        |
| S2-M3 vs S1-M8               | 148.500       | 8.398        | <0.001       | Yes                |
| S2-M3 vs <b>S2-M6</b>        | 123.000       | 8.032        | <0.001       | Yes                |
| S2-M3 vs S1-M9               | 109.500       | 8.461        | <0.001       | Yes                |
| S2-M3 vs S1-M2               | 105.500       | 9.984        | <0.001       | Yes                |
| S2-M3 vs S1-M7               | 48.000        | 5.864        | <0.001       | Yes                |
| S2-M3 vs S1-M1               | 41.000        | 7.084        | <0.001       | Yes                |
| S1-M1 vs S1-M8               | 107.500       | 7.020        | <0.001       | Yes                |
| S1-M1 vs <b>S2-M6</b>        | 82.000        | 6.336        | <0.001       | Yes                |
| S1-M1 vs <b>S1-M9</b>        | 68.500        | 6.482        | <0.001       | Yes                |
| S1-M1 vs S1-M2               | 64.500        | 7.880        | <0.001       | Yes                |
| S1-M1 vs S1-M7               | 7.000         | 1.209        | 0.392        | No                 |
| S1-M7 vs S1-M8               | 100.500       | 7.765        | <0.001       | Yes                |
| S1-M7 vs <b>S2-M6</b>        | 75.000        | 7.097        | <0.001       | Yes                |
| S1-M7 vs <b>S1-M9</b>        | 61.500        | 7.513        | 0.003        | Yes                |
| S1-M7 vs S1-M2               | 57.500        | 9.934        | <0.001       | Yes                |
| S1-M2 vs S1-M8               | 43.000        | 4.069        | 0.004        | Yes                |
| S1-M2 vs <b>S2-M6</b>        | 17.500        | 8.138        | <0.001       | Yes                |
| S1-M2 vs <b>S1-M9</b>        | 4.000         | 0.691        | 0.002        | Yes                |
| <b>S1-M9</b> vs S1-M8        | 39.000        | 4.765        | 0.005        | Yes                |
| <b>S1-M9</b> vs <b>S2-M6</b> | <b>13.500</b> | <b>2.332</b> | <b>0.099</b> | <b>Do Not Test</b> |
| S2-M6 vs S1-M8               | 25.500        | 4.406        | 0.002        | Yes                |

**Supplementary Table S3: Results of RM-ANOVA on ranks (for Supplementary Table S2) are presented.**

From all pairwise multiple comparisons, the reference phase is 9<sup>th</sup> minute of the setup-1 (**S1-M9**) and the reproducible phase is 6<sup>th</sup> minute of setup-2 (**S2-M6**). These two phases were statistically indifferent (i.e. with no significant differences and thereby, reproducible) to each other and were significantly ( $p$ -value  $\leq 0.005$ ) different to all other phases.

Note: The multiple comparisons on ranks do not include an adjustment for ties. A result of "Do Not Test" occurs for a comparison when no significant difference is found between the two rank sums that enclose that comparison. For example, if you had four rank sums sorted in order, and found no significant difference between rank sums 4 vs. 2, then you would not test 4 vs. 3 and 3 vs. 2, but still test 4 vs. 1 and 3 vs. 1 (4 vs. 3 and 3 vs. 2 are enclosed by 4 vs. 2: 4 3 2 1). Note that not testing the enclosed rank sums is a procedural rule, and a result of Do Not Test should be treated as if there is no significant difference between the rank sums, even though one may appear to exist.
